# Supplementary material for: A polyoxometalate-based polymer electrolyte with an improved electrode interface and ion conductivity for high-safety all-solid-state batteries
Source: Royal Society of Chemistry journal article supplement (doi:10.1039/c9ta04714j), 2019-01-01
Supplement: c9ta04714j1.pdf [file c9ta04714j1.pdf]

## Supporting Information

### **A polyoxometalate-based polymer electrolyte with improved electrode interphase and ion conductivity for high-safety all-solid-state batteries**

Xiangfei Yuan,<sup>a</sup> Cui Sun,<sup>a</sup> Jia-Ning Duan,<sup>a</sup> Jingmin Fan,<sup>a</sup> Ruming Yuan,<sup>a</sup> Jiajia Chen,<sup>a</sup> Jeng-Kuei Chang,<sup>b</sup> Mingsen Zheng\*<sup>a</sup> and Quanfeng Dong\*<sup>a</sup>

<sup>a</sup> State Key Laboratory of Physical Chemistry of Solid Surfaces, Department of Chemistry, College of Chemistry and Chemical Engineering, Collaborative Innovation Center of Chemistry for Energy Materials (*iChEM*), Xiamen University, Xiamen, Fujian 361005, China

<sup>b</sup> Department of Materials Science and Engineering, National Chiao Tung University, Hsinchu, Taiwan.

\*Correspondence: qfdong@xmu.edu.cn, mszheng@xmu.edu.cn

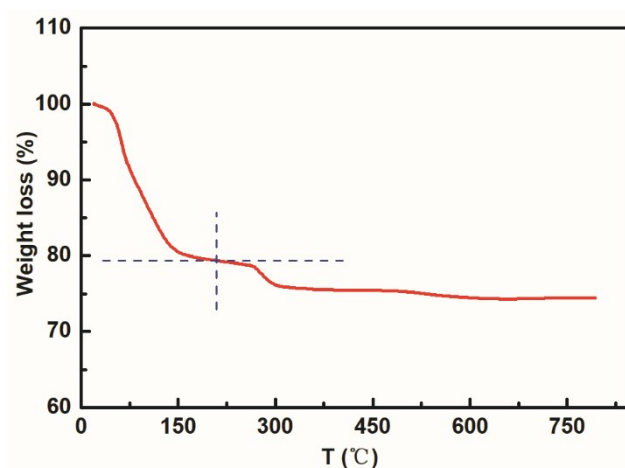

**Figure S1.** TGA plot of LVC from room temperature to 800 °C.

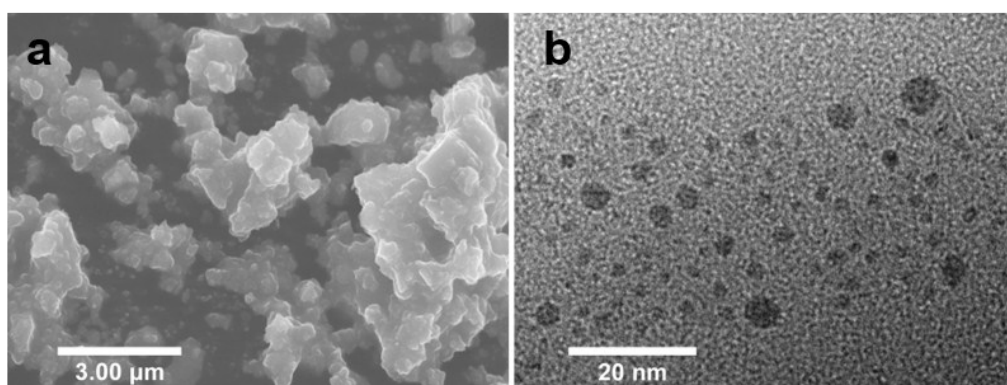

**Figure S2.** (a) SEM and (b) TEM images of LVC particles.

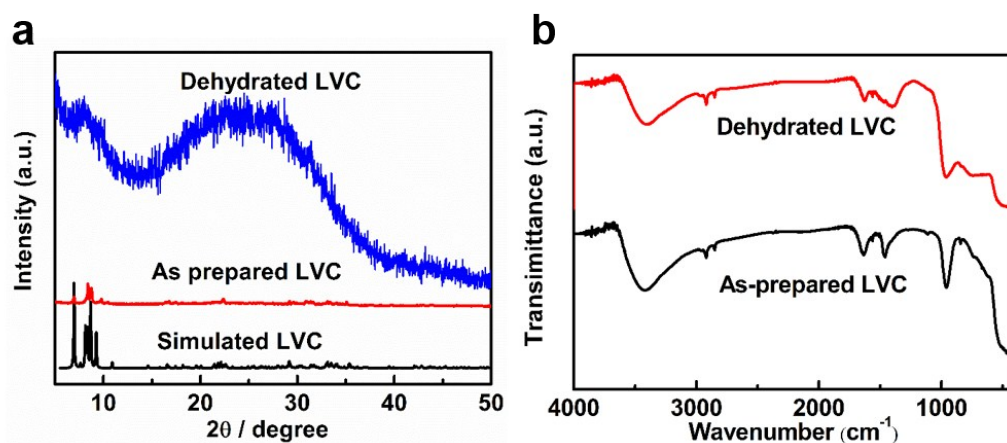

**Figure S3.** (a) The XRD patterns of as-prepared LVC (red), dehydrated LVC (blue) and simulated (black); (b) FTIR spectroscopy of LVC before (black) and after (red) heating at 200 °C under N<sub>2</sub> for 6 hours.

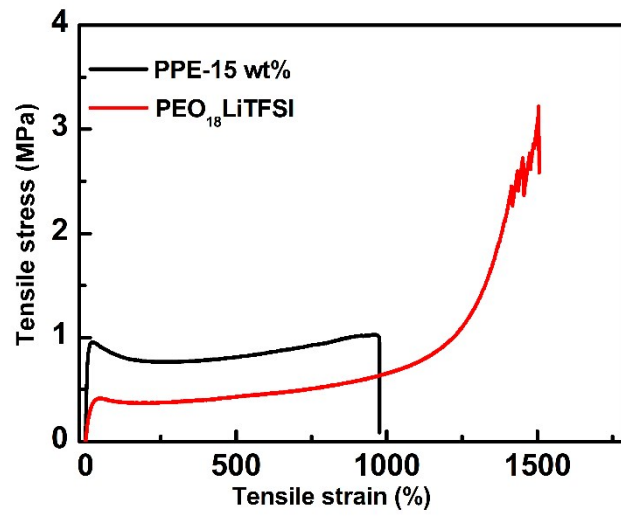

**Figure S4.** The tensile property of PPEs. Stress-strain curves of PPE-15 wt% (black) and PEO<sub>18</sub>LiTFSI (red).

**Table S1.** The tensile stress, tensile strain and Young's modulus of PPEs.

| Solid electrolytes       | Tensile stress (MPa) | Tensile strain (%) | Young's modulus (MPa) |
|--------------------------|----------------------|--------------------|-----------------------|
| PPE-15wt%                | 0.96                 | 974.93             | 4.57                  |
| PEO <sub>18</sub> LiTFSI | 0.41                 | 1506.30            | 1.50                  |

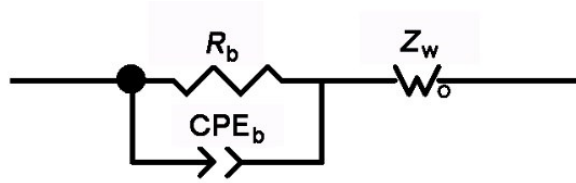

**Figure S5.** Equivalent circuit for the PPE membranes.

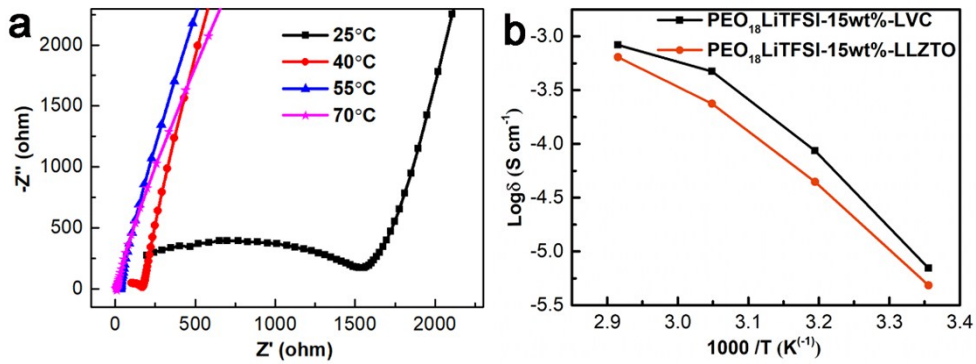

**Figure S6.** (a) Nyquist plots of  $\text{PEO}_{18}\text{LiTFSI-15 wt\%-LLZTO}$  comprised of the same proportion among PEO, LiTFSI and LLZTO ( $d=2 \mu\text{m}$ ) as PPE-15 wt% at temperatures from 25 °C to 70 °C; (b) Arrhenius plots for the ionic conductivity of composite polymer solid electrolyte with different LVC and LLZTO loading amounts.

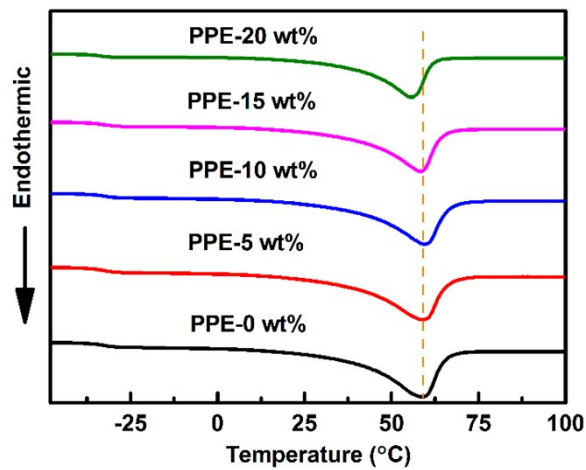

**Figure S7.** DSC characterization of PPEs with different LVC contents.

**Table S2.** Comparison of the  $T_g$ ,  $T_m$ ,  $\Delta H_c$  and  $\chi_c$  of PPEs with different LVC contents.

| Sample                   | $T_g$ (°C) | $T_m$ (°C) | $\Delta H_c$ (J·g <sup>-1</sup> ) | $\chi_c$ (%) |
|--------------------------|------------|------------|-----------------------------------|--------------|
| PEO <sub>18</sub> LiTFSI | -32.7      | 58.9       | 72.62                             | 33.98        |
| PPE-5 wt%                | -33.6      | 59.1       | 67.82                             | 31.74        |
| PPE-10 wt%               | -34.1      | 59.5       | 64.24                             | 30.06        |
| PPE-15 wt%               | -34.5      | 58.4       | 60.97                             | 28.53        |
| PPE-20 wt%               | -34.9      | 55.7       | 51.26                             | 23.99        |

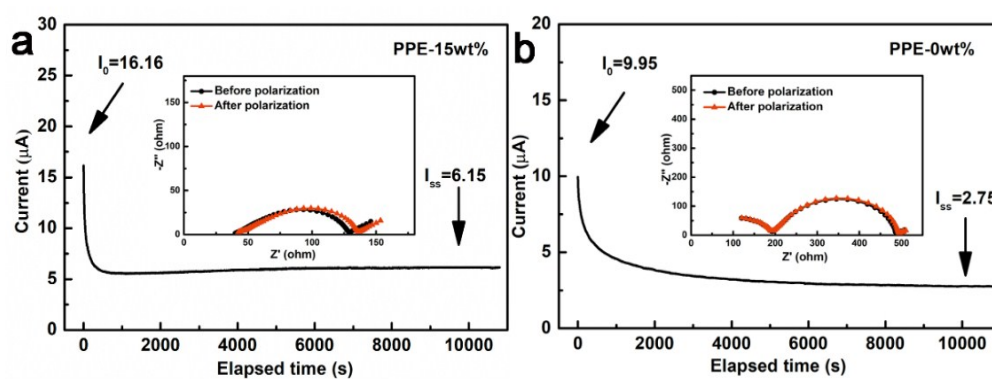

**Figure S8.** Chronoamperometry-time curves during the polarization of (a) Li| PPE-15 wt% |Li; (b) Li| PPE-0 wt% |Li cell at 40 °C, followed an applied potential of 5 mV; Insert: corresponding nyquist spectra before and after polarization.

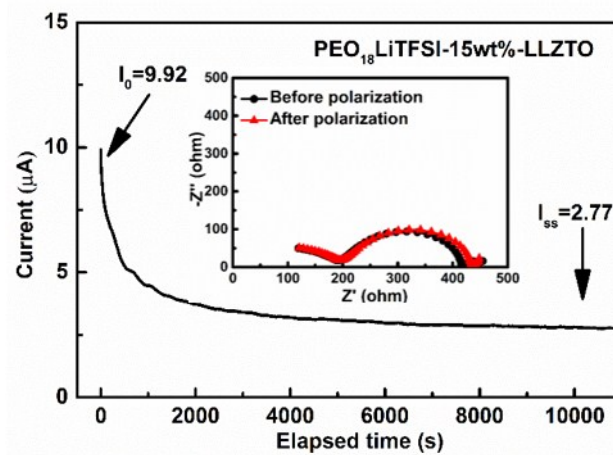

**Figure S9.** Chronoamperometry-time curves during the polarization of  $\text{Li}|\text{PEO}_{18}\text{LiTFSI-15 wt\%-LLZTO}|\text{Li}$  cell at  $40^\circ\text{C}$ , followed an applied potential of 5 mV; Insert: corresponding nyquist spectra before and after polarization.

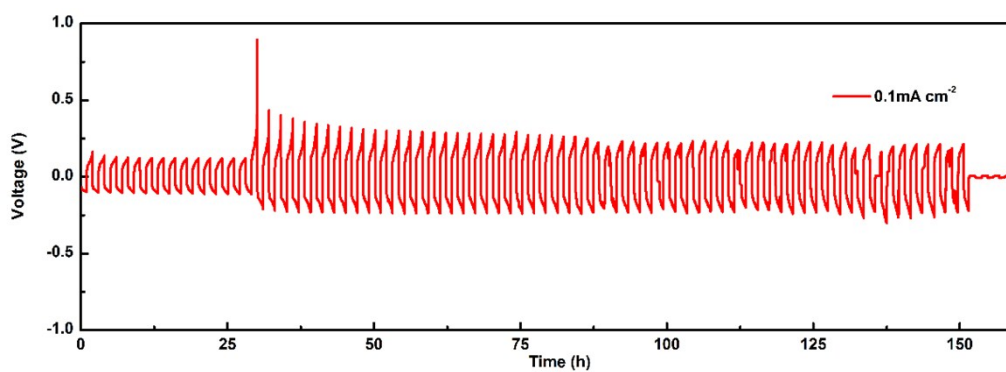

**Figure S10.** Voltage profile during the lithium plating/stripping cycling in  $\text{Li-Li}$  symmetrical cell with routine  $\text{PEO}_{18}\text{LiTFSI}$  electrolytes with a current density of  $0.10 \text{ mA cm}^{-2}$  at  $40^\circ\text{C}$ .

**Table S3.** Comparison of our work with related studies about the lithium plating/stripping measurement in Li-Li symmetrical cell.

| Solid electrolytes                                                                                                                                                                                                                      | Current density and temperature for Li deposition/stripping | Overpotential for Li deposition/stripping (mV) | Cycling hours for Li deposition/stripping (h) | Ref                                               |
|-----------------------------------------------------------------------------------------------------------------------------------------------------------------------------------------------------------------------------------------|-------------------------------------------------------------|------------------------------------------------|-----------------------------------------------|---------------------------------------------------|
| PPE-15wt%                                                                                                                                                                                                                               | 0.10 mA cm <sup>-2</sup> at 40 °C                           | 18                                             | >1300                                         | This work                                         |
| APCE-300 K                                                                                                                                                                                                                              | 0.10 mA cm <sup>-2</sup> at 60 °C                           | ~30                                            | > 80                                          | Nano Lett., 2018, <b>18</b> , 3829-3838.          |
| LPD@PVDF SIPE                                                                                                                                                                                                                           | 0.50 mA cm <sup>-2</sup> at 25 °C                           | 33                                             | >1050                                         | Small, 2018, <b>14</b> , 1801420                  |
| PEO-LLZTO-PEG-60 wt%<br>LiTFSI composite electrolyte                                                                                                                                                                                    | 0.50 mA cm <sup>-2</sup> at 55 °C                           | ~40                                            | >680                                          | Nano Energy, 2018, <b>46</b> , 176-184.           |
| P@CMOF                                                                                                                                                                                                                                  | 0.10 mA cm <sup>-2</sup> at 60 °C                           | 70                                             | 400                                           | Energy Storage Mater, 2019, <b>18</b> , 59-67.    |
| PEO-50 wt % LATP composite solid electrolyte                                                                                                                                                                                            | 0.1 mA cm <sup>-2</sup> at 60 °C                            | 30                                             | 200                                           | J. Phys. Chem. C 2018, <b>122</b> , 9852–9858     |
| Li <sub>6.1</sub> Ga <sub>0.3</sub> La <sub>3</sub> Zr <sub>2</sub> O <sub>12</sub> and NASICON-type Li <sub>2</sub> O-Al <sub>2</sub> O <sub>3</sub> -P <sub>2</sub> O <sub>5</sub> -TiO <sub>2</sub> -GeO <sub>2</sub> (LATP) pellets | 0.10 mA cm <sup>-2</sup> at room temperature                | < 50                                           | >220                                          | Energy Environ. Sci, 2018, <b>11</b> , 1803-1810. |

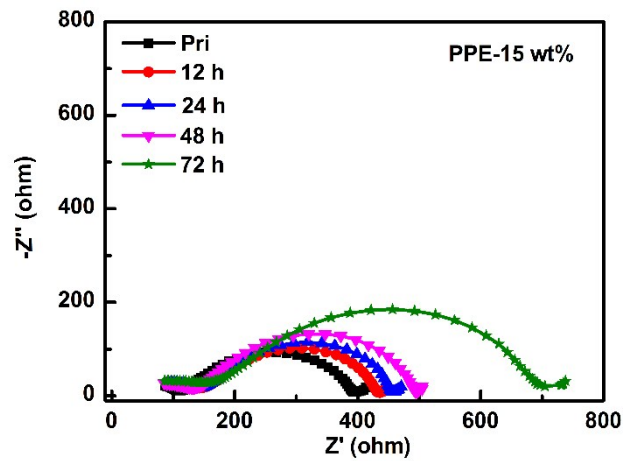

**Figure S11.** The impedance spectra of Li|PPE-15 wt%|Li cell bias voltage 0.18 V for different time at 40 °C.

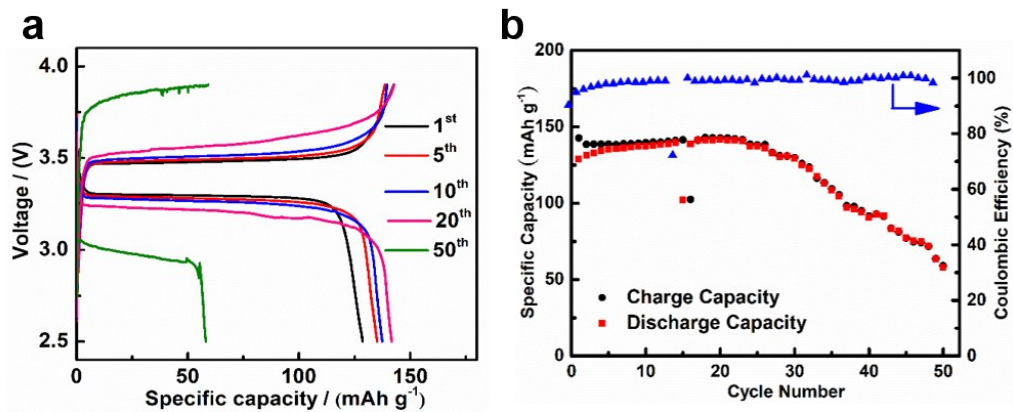

**Figure S12.** The typical cycling performance of LiFePO<sub>4</sub> | PEO<sub>18</sub>LiTFSI | Li cells. (a) Voltage profile and (b) cycling performance at 0.1 C at 40 °C.

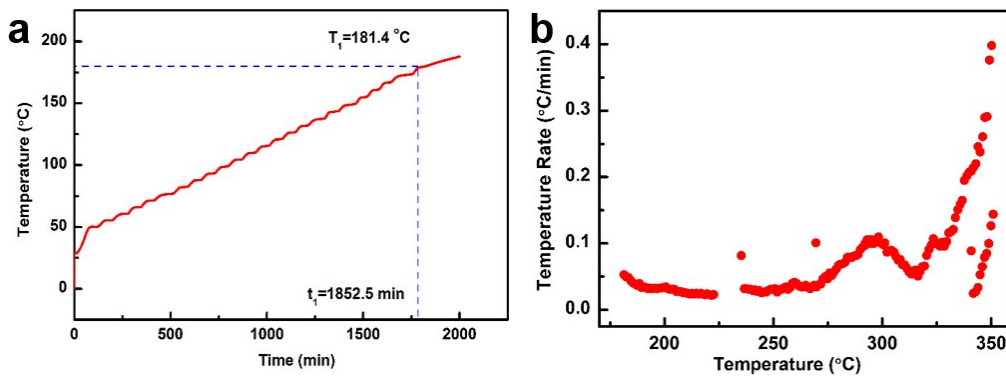



**Figure S13.** (a) A corresponding enlargement of ARC exotherm with LiFePO<sub>4</sub>| PPE-15 wt% |C cell; (b) The scatter diagram of corresponding temperature rate variation.

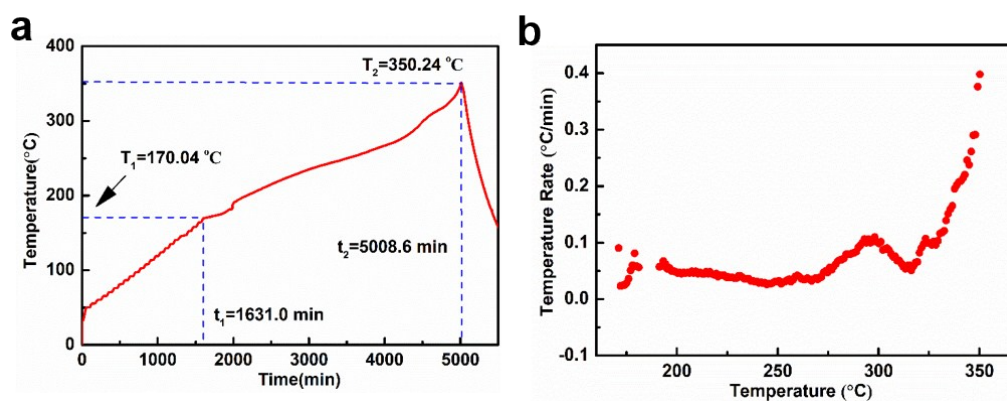

**Figure S14.** (a) ARC exotherm of LiFePO<sub>4</sub>| PPE-15 wt% |Li cell ranging from 50 °C to 360 °C.; (b) The scatter diagram of corresponding temperature rate variation.

**Table S4.** Comparison of ARC data between LiFePO<sub>4</sub>| PPE-15wt% |C and LiFePO<sub>4</sub>| PPE-15wt% |Li cells during the self-heating process.

| Batteries based-on PPE             | Onset Temperature (°C) | Onset Temperature Rate(°C min <sup>-1</sup> ) | Max Rate Temperature(°C) | Max Temperature Rate(°C min <sup>-1</sup> ) |
|------------------------------------|------------------------|-----------------------------------------------|--------------------------|---------------------------------------------|
| LiFePO <sub>4</sub>   PPE-15wt% C  | 181.4                  | 0.039                                         | 351.0                    | 0.398                                       |
| LiFePO <sub>4</sub>   PPE-15wt% Li | 170.04                 | 0.09                                          | 350.2                    | 0.398                                       |
